# Supplementary material
Source: PubMed Central journal article supplement (PMC1941496)
Supplement: pnas_0701464104_7.pdf [file pnas_0701464104_7.pdf]

**Table 1. Amino acid sequence of the chimeric constructs at the 24 polymorphic differences between 3D7 and FVO AMA-1**

| AA No. | 95 | 167 | 175 | 187 | 190 | 196 | 197 | 200 | 204 | 206 | 225 | 242 | 243 | 267 | 275 | 282 | 283 | 285 | 300 | 302 | 308 | 320 | 330 | 332 | 337 | 404 | 409, 418 | 439 | 443 | 451 |  |
|--------|----|-----|-----|-----|-----|-----|-----|-----|-----|-----|-----|-----|-----|-----|-----|-----|-----|-----|-----|-----|-----|-----|-----|-----|-----|-----|----------|-----|-----|-----|--|
| 3D7    | S  | T   | Y   | E   | M   | D   | E   | H   | D   | K   | I   | D   | K   | E   | I   | S   | Q   | K   | Q   | Q   | P   | I   | T   | T   | T   | N   | M        |     |     |     |  |
| FVO    | P  | K   | D   | N   | I   | N   | G   | D   | N   | E   | N   | Y   | N   | Q   | K   | L   | E   | E   | E   | E   | S   | N   | R   | R   | R   | H   | K        |     |     |     |  |
| D1     | P  | K   | D   | N   | I   | N   | G   | D   | N   | E   | N   | Y   | N   | Q   | K   | L   | E   | E   | E   | E   | S   | N   | R   | R   | R   | H   | K        |     |     |     |  |
| D2     |    |     |     |     |     |     |     |     |     |     |     |     |     |     |     |     |     |     |     |     | E   | S   | N   | R   | R   | H   | K        |     |     |     |  |
| D3     |    |     |     |     |     |     |     |     |     |     |     |     |     |     |     |     |     |     |     |     | E   | S   | N   | R   | R   | H   | K        |     |     |     |  |
| D2+3   |    |     |     |     |     |     |     |     |     |     |     |     |     |     |     |     |     |     |     |     | E   | S   | N   | R   | R   | H   | K        |     |     |     |  |
| C1     |    |     |     | N   | I   | N   | G   | D   | N   | E   | N   |     |     |     |     |     |     |     |     |     |     |     |     |     |     |     |          |     |     |     |  |
| C2     |    |     |     |     |     |     |     |     |     |     |     | Y   | N   |     |     | K   | L   | E   |     |     |     |     |     |     |     |     |          |     |     |     |  |
| C3     |    |     | D   |     |     |     |     |     |     |     |     |     |     | Q   |     |     |     |     |     |     |     |     |     |     |     |     |          |     |     |     |  |
| C1-L   |    |     |     |     | N   | I   | N   | G   | D   | N   | E   |     |     |     |     |     |     |     |     |     |     |     |     |     |     |     |          |     |     |     |  |
| C1+C2  |    |     |     | N   | I   | N   | G   | D   | N   | E   | N   | Y   | N   |     |     | K   | L   | E   |     |     |     |     |     |     |     |     |          |     |     |     |  |

Dom-1 Dom-2 Dom-3  
 Amino acid number is shown in horizontal text; position of the 16 inter-species conserved cysteines are shown in yellow cells and vertical blue text.
