# Supplementary material
Source: PubMed Central journal article supplement (PMC1941496)

m 3D7 FVO D1 D2 D3 C1 C2

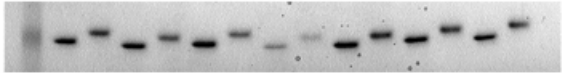

m C1+C2 C3 C1-L D2+3

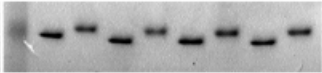

Supplement: pnas_0701464104_1.pdf [file pnas_0701464104_1.pdf]

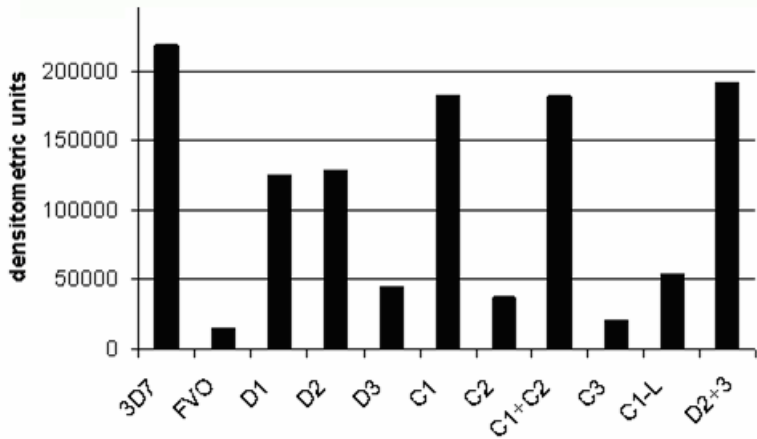

Supplement: pnas_0701464104_2.pdf [file pnas_0701464104_2.pdf]

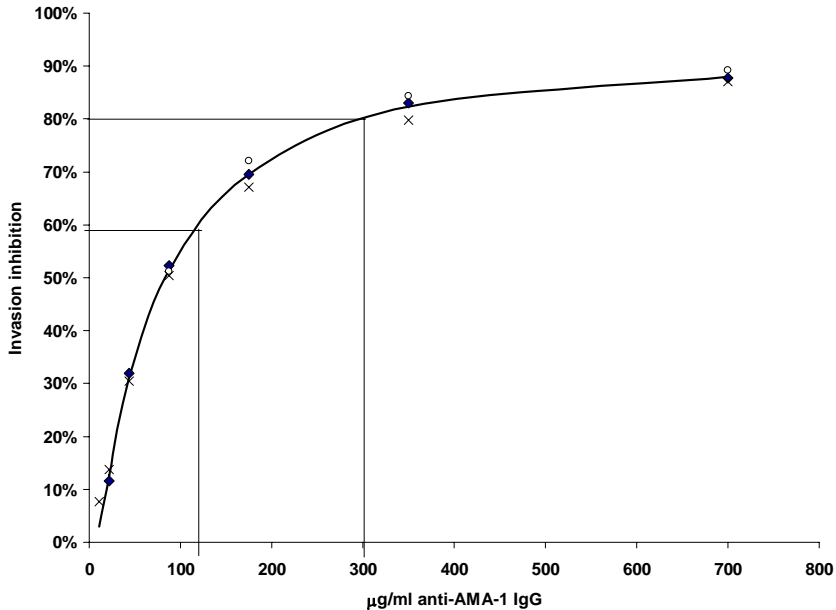

Supplement: pnas_0701464104_3.pdf [file pnas_0701464104_3.pdf]

1

2

3

4

5

6

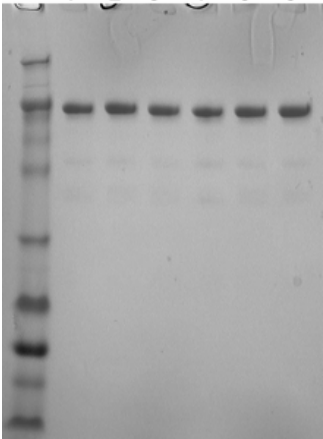

Supplement: pnas_0701464104_4.pdf [file pnas_0701464104_4.pdf]

### FVO target

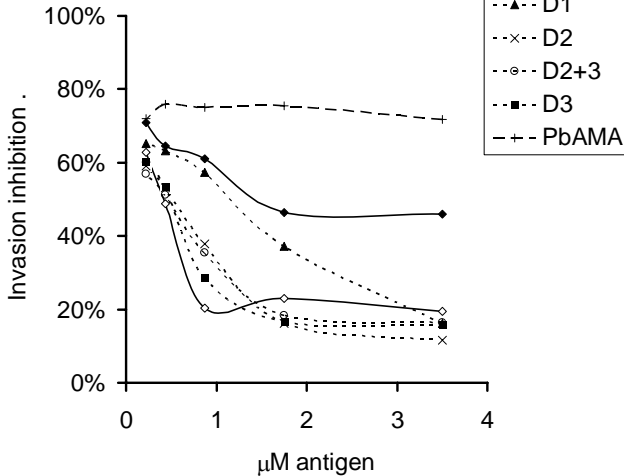

Supplement: pnas_0701464104_5.pdf [file pnas_0701464104_5.pdf]
